# Supplementary material for: Few amino acid signatures distinguish HIV-1 subtype B pandemic and non-pandemic strains
Source: PubMed Central journal article supplement (PMC7508567; doi:10.1371/journal.pone.0238995), 2020-09-22
Supplement: pone.0238995.s002.pdf [file pone.0238995.s002.pdf]

**S1 Table.** Classification of the HIV-1 subtype B sequences in the B<sub>PANDEMIC</sub> or B<sub>CAR</sub>

| Dataset                                                     | Country*     | Subtype B       | B <sub>PANDEMIC</sub> (%) | B <sub>CAR</sub> (%) | Putative Recombinants (%) |
|-------------------------------------------------------------|--------------|-----------------|---------------------------|----------------------|---------------------------|
| FL                                                          | DO           | 4               | -                         | 4 (100)              | -                         |
|                                                             | HT           | 6               | -                         | 5 (83)               | 1 (17)                    |
|                                                             | JM           | 8               | 4 (50)                    | 4 (50)               | -                         |
|                                                             | TT           | 5               | -                         | 5 (100)              | -                         |
|                                                             | BR           | 118             | 106 (90)                  | 1 (1)                | 11 (9)                    |
|                                                             | US           | 330             | 306 (93)                  | 9 (3)                | 15 (5)                    |
|                                                             | Others       | 35              | 34 (97)                   | -                    | 1 (3)                     |
|                                                             | <b>Total</b> | <b>506</b>      | <b>450 (88)</b>           | <b>28 (6)</b>        | <b>28 (6)</b>             |
| <b>Years</b>                                                | 1978-2015    | 1978-2015       | 1983-2011                 | 1986-2012            |                           |
| <i>gag</i><br>(HXB2 coordinates 1,264 to 2,148)             | DO           | 4               | -                         | 4 (100)              | -                         |
|                                                             | HT           | 12              | 3 (25)                    | 9 (75)               | -                         |
|                                                             | JM           | 18              | 8 (44)                    | 10 (56)              | -                         |
|                                                             | TT           | 5               | -                         | 5 (100)              | -                         |
|                                                             | BR           | 107             | 106 (99)                  | 1 (1)                | -                         |
|                                                             | US           | 315             | 306 (97)                  | 9 (3)                | -                         |
|                                                             | Others       | 34              | 34 (100)                  | -                    | -                         |
|                                                             | <b>Total</b> | <b>495</b>      | <b>457 (92)</b>           | <b>38 (8)</b>        | -                         |
| <b>Years</b>                                                | 1978-2015    | 1978-2015       | 1983-2011                 | -                    |                           |
| <i>pol</i><br>(HXB2 coordinates 2,253 to 3,272)             | BS           | 14              | 5 (36)                    | 9 (64)               | -                         |
|                                                             | DO           | 144             | 39 (27)                   | 105 (73)             | -                         |
|                                                             | HT           | 5               | -                         | 5 (100)              | -                         |
|                                                             | JM           | 151             | 78 (52)                   | 73 (48)              | -                         |
|                                                             | TT           | 5               | -                         | 5 (100)              | -                         |
|                                                             | BR           | 107             | 106 (99)                  | 1 (1)                | -                         |
|                                                             | US           | 315             | 306 (97)                  | 9 (3)                | -                         |
|                                                             | Others       | 34              | 34 (100)                  | -                    | -                         |
| <b>Total</b>                                                | <b>775</b>   | <b>568 (74)</b> | <b>207 (26)</b>           | -                    |                           |
| <b>Years</b>                                                | 1978-2015    | 1978-2015       | 1983-2011                 | -                    |                           |
| <i>env</i><br>(HXB2 coordinates 6,450 to 8,480)             | DO           | 5               | 1 (20)                    | 4 (80)               | -                         |
|                                                             | HT           | 11              | -                         | 11 (100)             | -                         |
|                                                             | JM           | 9               | 5 (56)                    | 4 (44)               | -                         |
|                                                             | TT           | 40              | -                         | 40 (100)             | -                         |
|                                                             | BR           | 107             | 106 (99)                  | 1 (1)                | -                         |
|                                                             | US           | 315             | 306 (97)                  | 9 (3)                | -                         |
|                                                             | Others       | 34              | 34 (100)                  | -                    | -                         |
|                                                             | <b>Total</b> | <b>529</b>      | <b>452 (87)</b>           | <b>69 (13)</b>       | -                         |
| <b>Years</b>                                                | 1978-2015    | 1978-2015       | 1983-2011                 | -                    |                           |
| <i>pol</i> -drug naïve<br>(HXB2 coordinates 2,253 to 3,272) | CU           | 85              | 84 (99)                   | 1 (1)                | -                         |
|                                                             | DO           | 143             | 42 (29)                   | 101 (71)             | -                         |
|                                                             | HT           | 5               | 1 (20)                    | 4 (80)               | -                         |
|                                                             | JM           | 26              | 11 (42)                   | 15 (58)              | -                         |
|                                                             | GF           | 255             | 109 (43)                  | 146 (57)             | -                         |
|                                                             | SR           | 57              | 33 (58)                   | 24 (42)              | -                         |
|                                                             | Others       | 6               | 1 (100)                   | 5 (100)              | -                         |
|                                                             | <b>Total</b> | <b>577</b>      | <b>281 (49)</b>           | <b>296 (51)</b>      | -                         |
| <b>Years</b>                                                | 2005-2012    | 2005-2012       | 2005-2012                 | -                    |                           |

The table summarizes the results of the classification of the full-length (FL) and partial HIV-1 subtype B sequences in the B<sub>PANDEMIC</sub> or B<sub>CAR</sub> based on their placement on ML phylogenetic trees displayed in Figures 1 and S1. All sub-datasets are accompanied by their sampling range. \*Country codes are in accordance with ISO 3166-1.
