# Supplementary material for: Few amino acid signatures distinguish HIV-1 subtype B pandemic and non-pandemic strains
Source: PubMed Central journal article supplement (PMC7508567; doi:10.1371/journal.pone.0238995), 2020-09-22
Supplement: pone.0238995.s004.pdf [file pone.0238995.s004.pdf]

**S3 Table.** Predicted co-receptor usage by B<sub>CAR</sub> and B<sub>PANDEMIC</sub> *env* sequences.

| Subtype B Lineage                       | Geno2Pheno    |                         | 11/25 Rule |         | 25R/Net Charge (%) |
|-----------------------------------------|---------------|-------------------------|------------|---------|--------------------|
|                                         | R5-tropic (%) | X4- or R5/X4-tropic (%) | 11 R/K (%) | 25K (%) |                    |
| B <sub>CAR</sub> ( <i>n</i> = 59)       | 68            | 32                      | 5          | 3       | -                  |
| B <sub>PANDEMIC</sub> ( <i>n</i> = 450) | 71            | 29                      | 6          | 4       | 1                  |
| <i>p</i> -value                         |               | 0.682                   | 0.914      | 1       | -                  |

The table summarizes the predicted usage of chemokines receptors CCR5 and CXCR4 based on different criteria: 1) the Geno2Pheno algorithm, which classifies the sequences between R5 variants or X4 and R5X4 dual-tropic variants; 2) the 11/25 Rule, which assesses the presence of arginine (R) or lysine (K) at position 11 of *env* V3 sequences and/or K at position 25; 3) the combination of R at position 25 of V3 and a net charge of  $\geq 5$ .
