# Supplementary material for: Few amino acid signatures distinguish HIV-1 subtype B pandemic and non-pandemic strains
Source: PubMed Central journal article supplement (PMC7508567; doi:10.1371/journal.pone.0238995), 2020-09-22
Supplement: pone.0238995.s005.pdf [file pone.0238995.s005.pdf]

**S4 Table.** Prevalence of transmitted drug-resistance mutations in B<sub>CAR</sub> and B<sub>PANDEMIC</sub> PR/RT sequences.

| Resistance Category | B <sub>CAR</sub> |                      | B <sub>PANDEMIC</sub> |                      | <i>p</i> -value |
|---------------------|------------------|----------------------|-----------------------|----------------------|-----------------|
|                     | # seq. analyzed  | # seq. with SDRM (%) | # seq. analyzed       | # seq. with SDRM (%) |                 |
| any SDRM            | 296              | 25 (8.4)             | 281                   | 34 (12.1)            | 0.190           |
| PI SDRM             | 295              | 5 (1.7)              | 280                   | 6 (2.1)              | 0.930           |
| NRTI SDRM           | 295              | 17 (5.8)             | 278                   | 18 (6.5)             | 0.856           |
| NNRTI SDRM          | 295              | 10 (3.4)             | 278                   | 18 (6.5)             | 0.129           |

The table summarizes the surveillance drug-resistance mutations (SDRM) identified in PR/RT B<sub>CAR</sub> and B<sub>PANDEMIC</sub> sequences retrieved from drug naïve subjects. PI (protease inhibitor), NRTI (nucleoside analog reverse-transcriptase inhibitors), NNRTI (non-nucleoside analog reverse-transcriptase inhibitor). The *p*-values obtained in chi-squared tests are listed in the last column.
