# Supplementary material for: Few amino acid signatures distinguish HIV-1 subtype B pandemic and non-pandemic strains
Source: PubMed Central journal article supplement (PMC7508567; doi:10.1371/journal.pone.0238995), 2020-09-22
Supplement: pone.0238995.s006.pdf [file pone.0238995.s006.pdf]

**FULL LENGTH GENOMES:**

|           |          |          |
|-----------|----------|----------|
| KJ704795  | AB485638 | JN944930 |
| KJ704794  | FJ496145 | FJ496167 |
| KJ704793  | AF069140 | DQ853436 |
| KJ704792  | DQ487190 | JN944917 |
| KJ704791  | AY713410 | JQ403101 |
| KJ704789  | JN024274 | KT124799 |
| AY835759  | KU678161 | KT124748 |
| AY835777  | AY835753 | JN944911 |
| AY835770  | AY308760 | FJ496151 |
| AY835754  | JN024422 | FJ469738 |
| K02007    | AY331289 | FJ496072 |
| AY835779  | AY331287 | JQ403105 |
| AY835762  | AY331284 | KT124764 |
| AY352275  | AY331282 | FJ469728 |
| M17449    | KT124770 | FJ469730 |
| AB221005  | KT124745 | FJ469734 |
| AY835769  | KT124744 | FJ469751 |
| AY835755  | AY560110 | FJ469754 |
| U69584    | AY560109 | FJ469757 |
| AY835774  | AY560108 | FJ469758 |
| AY835757  | AY560107 | FJ469741 |
| AF004394  | KT124771 | FJ469737 |
| M38429    | KT124769 | FJ469688 |
| M93258    | KT124747 | FJ469687 |
| AF286365  | EF175209 | FJ469760 |
| AY835766  | AY331296 | FJ469762 |
| 89.U39362 | JQ403100 | KT124807 |
| AY713412  | KT124798 | KT124781 |
| AY173955  | KT124776 | FJ469742 |
| AY173954  | KT124759 | FJ469755 |
| AY173952  | EF363122 | FJ469739 |
| FJ496158  | KT124806 | FJ469764 |

|          |          |          |
|----------|----------|----------|
| FJ469753 | KT124778 | JF689864 |
| FJ469701 | KF990605 | JF689863 |
| FJ469686 | JF320482 | JF689862 |
| FJ469765 | JN024459 | JF320169 |
| FJ469759 | FJ469683 | JQ403095 |
| FJ469740 | JF320361 | JQ403068 |
| FJ469743 | JF320043 | KT124791 |
| FJ469770 | FJ469717 | JF320044 |
| EF363127 | FJ469703 | JF320003 |
| EF363124 | FJ469718 | JF320613 |
| JQ403107 | FJ469724 | JF320036 |
| JQ403104 | FJ469682 | KF990608 |
| KT124758 | JF320185 | JF320120 |
| FJ469733 | JN024469 | JF320097 |
| FJ469695 | FJ469747 | JF320038 |
| FJ469732 | JF320059 | FJ469709 |
| JN024203 | JF320054 | JF320145 |
| FJ469772 | JN024450 | JF320526 |
| FJ469722 | JN024339 | JF320160 |
| EU547186 | FJ496000 | FJ469708 |
| FJ469697 | FJ495937 | JF320144 |
| FJ469745 | FJ495818 | JF320356 |
| FJ469698 | JF689876 | FJ469723 |
| JN024100 | JF689875 | FJ469714 |
| FJ469684 | JF689874 | FJ469696 |
| DQ886037 | JF689873 | JF320615 |
| FJ496081 | JF689872 | JF320363 |
| JF689860 | JF689871 | JF320048 |
| JF689859 | JF689870 | FJ469700 |
| JF689857 | JF689868 | JN944897 |
| JF689856 | JF689867 | JF320564 |
| JF689854 | JF689866 | JF320263 |
| JF689852 | JF689865 | FJ469691 |

|          |          |          |
|----------|----------|----------|
| KY112056 | JF320460 | KX228807 |
| JF689892 | JF689897 | JN397364 |
| JF689890 | JF689896 | KC473828 |
| JF689889 | JF689895 | KC473826 |
| JF689887 | JF689894 | KC473829 |
| JF689886 | JQ403099 | KC473827 |
| JF689884 | JQ403091 | KC473825 |
| JF689883 | JQ403087 | KX228803 |
| JF689879 | JQ403083 | KX228802 |
| JF689877 | JQ403069 | KU677989 |
| JQ403093 | JQ403067 | KU678069 |
| JQ403071 | JQ403061 | KC473834 |
| JQ403096 | JQ403035 | KC473835 |
| JQ403092 | JQ403088 | KC473833 |
| JQ403078 | JQ403086 | KC473831 |
| JQ403066 | JQ403074 | KF384813 |
| JQ403064 | JQ403070 | KF384812 |
| JQ403060 | JQ403030 | KF384811 |
| JQ403056 | KT124793 | KF384810 |
| JX863922 | KT124774 | KF384809 |
| JX863921 | KT124761 | KF384808 |
| KT124801 | KY112127 | KF384807 |
| JF320559 | KY112429 | KF384806 |
| FJ469721 | KY112136 | KF384805 |
| JF320530 | KY112461 | KF384804 |
| JF320179 | KY112522 | KF384803 |
| JF320150 | GU733713 | KF384802 |
| JF320577 | JX140657 | KF384801 |
| JF320197 | KC473824 | KF384800 |
| FJ469689 | KC935959 | KF384799 |
| FJ469707 | KC935958 | KF384798 |
| JF320045 | JX863924 | KU641402 |
| FJ469713 | KX228825 | KT124809 |

|          |          |          |
|----------|----------|----------|
| KT124775 | KX505504 | FJ195090 |
| KT124766 | KX505552 | FJ195091 |
| KF526174 | KX505446 | JF320008 |
| KF526228 | AB485641 | JF320012 |
| KF526261 | AY037268 | JF320017 |
| KF526298 | AY037269 | JF320018 |
| KT124790 | AY037270 | JF320028 |
| KT124785 | AY037282 | JF320186 |
| KT124784 | AY561236 | JF320189 |
| KT124768 | AY561238 | JF320191 |
| KT124756 | AY561240 | JF320196 |
| KT124750 | AY781126 | JF320198 |
| KY778593 | AY781127 | JN235958 |
| KY778473 | DQ358809 | JN235959 |
| KU901995 | DQ358810 | JN235965 |
| KU901976 | DQ383746 | JN251901 |
| KT124796 | DQ383748 | JN251906 |
| KU749387 | DQ383749 | JN692431 |
| KY766150 | DQ383751 | JN692432 |
| KT284371 | DQ383752 | JN692433 |
| KY778390 | EF637046 | JN692435 |
| KY778345 | EF637047 | JN692439 |
| KX505583 | EF637048 | JN692440 |
| KX505652 | EF637049 | JN692443 |
| KX505686 | EF637050 | JN692444 |
| KY658693 | EF637051 | JN692445 |
| KU678025 | EF637053 | JN692446 |
| KY778289 | EF637054 | JN692450 |
| KX505739 | EF637056 | JN692451 |
| KU678049 | EF637057 | JN692452 |
| KX505419 | FJ195086 | JN692453 |
| KX505475 | FJ195088 | JN692454 |
| KX505396 | FJ195089 | JN692455 |

|          |          |          |
|----------|----------|----------|
| JN692457 | KT427685 | KT427772 |
| JN692460 | KT427687 | KT427781 |
| JN692461 | KT427693 | KT427783 |
| JN692462 | KT427694 | KT427786 |
| JN692463 | KT427699 | KT427787 |
| JN692465 | KT427700 | KT427791 |
| JN692472 | KT427701 | KT427803 |
| JN692473 | KT427706 | KT427805 |
| JN692474 | KT427709 | KT427808 |
| JN692475 | KT427711 | KT427815 |
| JN692476 | KT427713 | KT427819 |
| JN692479 | KT427715 | KT427824 |
| JN692480 | KT427717 | KT427826 |
| KJ849767 | KT427718 | KT427827 |
| KJ849780 | KT427723 | KT427830 |
| KJ849784 | KT427729 | KT427831 |
| KJ849785 | KT427730 | KT427869 |
| KJ849790 | KT427742 | KT427870 |
| KJ849799 | KT427744 | KY658683 |
| KJ849801 | KT427745 | KY658684 |
| KJ849803 | KT427748 | KY658685 |
| KJ849804 | KT427751 | KY658686 |
| KJ849808 | KT427753 | AY586542 |
| KJ849811 | KT427754 | AY586543 |
| KJ849812 | KT427755 | EU839596 |
| KJ849814 | KT427757 | EU839597 |
| KJ849815 | KT427763 | EU839598 |
| KJ849818 | KT427764 | EU839600 |
| KT427650 | KT427765 | EU839601 |
| KT427670 | KT427768 | EU839602 |
| KT427675 | KT427769 | EU839603 |
| KT427676 | KT427770 | EU839604 |
| KT427682 | KT427771 | EU839605 |

EU839606 FJ211651  
EU839607  
EU839608  
EU839609  
EU839610  
KY658702  
HM030559  
HM030560  
HM030561  
HM030562  
HM030563  
HM030564  
HM030565  
M17451

***gag***

**(HXB2: 1,264-2,148)**

FJ211725 FJ211737  
FJ211625  
FJ211613  
FJ211712  
FJ211762  
FJ211749  
FJ211676  
FJ211791  
FJ211790  
FJ211701  
FJ211805  
FJ211792  
FJ211782  
FJ211777  
FJ211638

*pol*

**(HXB2: 2,253-3,272)**

|          |          |          |
|----------|----------|----------|
| DQ518437 | JN713693 | JN713601 |
| DQ518434 | GU437891 | JN713630 |
| DQ518438 | JN713588 | JN713571 |
| JN713587 | JN713661 | JN713680 |
| GU437882 | JN713568 | JN713657 |
| GU972720 | GU972771 | JN713599 |
| JN713702 | JN713669 | JN713602 |
| JN713684 | JQ237877 | JN713616 |
| JN713665 | JQ237874 | JN713629 |
| JN713631 | GU972750 | GU437893 |
| JN713652 | GU437904 | GU972728 |
| JN713706 | JQ237891 | GU972722 |
| JN713585 | GU972739 | GU437912 |
| JN713576 | GU437906 | GU437900 |
| DQ518431 | JN713597 | GU437880 |
| DQ518427 | JN713683 | GU437903 |
| DQ518430 | JN713604 | GU437907 |
| GU437913 | GU972781 | JQ237889 |
| JN713582 | GU972727 | JQ237880 |
| JN713677 | GU972766 | JQ237883 |
| JN713591 | JN713697 | JQ237875 |
| JN713707 | JN713624 | JQ237870 |
| JN713615 | JN713633 | JQ237882 |
| JN713569 | JN713653 | JQ237879 |
| JN713610 | DQ518429 | JQ237864 |
| JN713673 | JN713681 | GU972747 |
| JN713612 | JN713709 | GU972782 |
| JN713594 | JN713590 | GU972776 |
| JN713666 | JN713617 | GU972738 |

|          |          |          |
|----------|----------|----------|
| GU972779 | JN713647 | JN713577 |
| GU972742 | JN713690 | JN713613 |
| GU972762 | JN713692 | JN713622 |
| GU972760 | JN713621 | JN713578 |
| GU972753 | JN713640 | JN713668 |
| GU972735 | JN713611 | JN713570 |
| GU972746 | JN713626 | JN713695 |
| JQ237872 | JN713605 | JN713598 |
| JQ237887 | JN713656 | GU972774 |
| GU972725 | JN713685 | JN713572 |
| GU972724 | JN713646 | GU972723 |
| JQ237869 | JN713655 | GU972777 |
| GU437887 | JN713642 | JQ237888 |
| JQ237890 | JN713596 | JN713592 |
| GU972769 | JN713678 | JN713676 |
| GU437884 | JN713608 | JN713696 |
| JQ237863 | JN713688 | JN713583 |
| GU972783 | JN713595 | JN713638 |
| GU437897 | JN713708 | JN713687 |
| JQ237855 | JN713664 | JN713654 |
| JQ237852 | JN713600 | JN713644 |
| GU437894 | JN713662 | JN713574 |
| GU437911 | JN713689 | JN713703 |
| GU972748 | JN713675 | JN713670 |
| GU972780 | JN713579 | JN713567 |
| JQ237856 | JN713632 | JN713620 |
| JQ237860 | JN713573 | DQ518440 |
| JQ237871 | JN713701 | JN713658 |
| GU972765 | JN713643 | JN713580 |
| DQ518435 | JN713635 | JN713589 |
| JN713674 | DQ518432 | JQ237857 |
| JQ237867 | JN713607 | DQ518436 |
| JN713649 | JN713705 | DQ518433 |



|          |          |          |
|----------|----------|----------|
| GU972756 | GU437879 | JN713679 |
| GU972754 | GU972775 | JN713645 |
| JN713636 | GU972772 | JN713650 |
| JN713691 | GU437877 | JN713593 |
| JN713623 | JN713628 | JN713606 |
| GU437889 | JN713651 | JN713614 |
| GU437886 | JN713686 | JN713586 |
| JN713698 | GU437878 | JN713682 |
| GU437902 | GU972733 | GU437898 |
| GU437892 | GU972737 | JN713660 |
| GU972734 | GU972752 | JQ237885 |
| GU972732 | GU972740 | JQ237868 |
| GU972730 | GU972736 | JQ237876 |
| GU972761 | GU972741 | JQ237858 |
| GU972751 | GU972764 | JQ237881 |
| GU972759 | JN713639 | JQ237878 |
| GU972767 | JN713581 | GU972743 |
| GU972719 | JN713699 | JQ237865 |
| JQ237886 | JN713671 | JQ237859 |
| GU437896 | JN713694 | JN713641 |
| GU972721 | JN713619 | GU972744 |
| GU437909 | GU972757 | JQ237884 |
| GU972763 | JN713672 | DQ518439 |
| GU437888 | JN713700 | JN713575 |
| GU437881 | JQ237866 | JN713603 |
| GU972749 | JQ237853 | JN713648 |
| GU972768 | JN713625 | JN713618 |
| GU972770 | JN713663 | GU972729 |
| JQ237851 | JN713609 | DQ518428 |
| GU437895 | JN713704 | GU972773 |
| GU972731 | GU437883 | JQ237873 |
| GU437885 | GU972726 | JN713627 |
| GU437899 | GU972758 | GU437901 |

|          |          |
|----------|----------|
| GU437890 | AF277054 |
| JN713667 | EF593264 |
| GU972755 | EF593268 |
| GU437908 | EF593266 |
| JQ237862 | EF593265 |
| GU437910 | AF277062 |
| GU437905 | AF277072 |
| JQ237854 | AF277063 |
| JN713584 | AF277057 |
| GU972778 | AF277060 |
| GU972745 | AF277056 |
| JQ237861 |          |

*env*

**(HXB2: 6,450-8,480)**

|          |          |
|----------|----------|
| JF680925 | AF277068 |
| FJ817365 | AF277067 |
| EF593240 | HQ217651 |
| AF277059 | AF277055 |
| AF277066 | AF277058 |
| EF593267 | EF593261 |
| HQ217760 | AF277065 |
| EF593260 | AF277071 |
| AF277073 | AF277064 |
| AF277070 | AY669724 |
| AF277069 | U08446   |
| EF593262 | U08447   |
| AF277074 | U08443   |
| AF277061 | U08441   |
| AF277075 | AY669721 |
| EF593263 |          |
| EF593259 |          |

**pol (Drug Naïve)**

**(HXB2: 2,253-3,272)**

|          |          |          |
|----------|----------|----------|
| KT998079 | KT998221 | KT998148 |
| KT998159 | KX390957 | JN713698 |
| KT998231 | KT998040 | JN713691 |
| KX390962 | KT998083 | JN713623 |
| JX194204 | KT998225 | KT998262 |
| KT998074 | KP688156 | KT998140 |
| JN713660 | GU437890 | KT998117 |
| HQ655409 | JN713667 | JN713580 |
| JN713639 | JN713671 | DQ832138 |
| KT998243 | JN000037 | HM030561 |
| KT998276 | KP688151 | JN713694 |
| KT998096 | JN713641 | JN713619 |
| JN713658 | KT998177 | KP688135 |
| KT998245 | KT998078 | GU972741 |
| KT998280 | KT998205 | KT998199 |
| KT998003 | KT998008 | JN713618 |
| JN713603 | KU052749 | KT998213 |
| GU437905 | KU052750 | KT998010 |
| JN713575 | KT998157 | JN713663 |
| KX390969 | KT998214 | HQ655399 |
| KX390881 | KT998013 | KT998023 |
| KT998278 | KT998049 | KT998259 |
| GU437898 | JN713651 | KT998250 |
| KT998084 | KP688154 | JN713584 |
| KT998227 | HM030565 | JN713682 |
| KT998047 | GU972734 | JN713686 |
| KX390963 | GU972721 | JN713586 |
| KX390908 | HM030563 | KT998106 |
| KT998196 | GU972758 | KT998229 |

|          |          |          |
|----------|----------|----------|
| KT998260 | KP688174 | KT998258 |
| JN000008 | KP688114 | JN713593 |
| JN000048 | KP688157 | KT998087 |
| JN000005 | HQ655381 | JN713606 |
| JN000016 | KP688110 | KP688140 |
| JX194216 | HQ655360 | JN713700 |
| HQ655396 | JN000050 | KX390940 |
| JN000033 | HQ655375 | JX194186 |
| KP688158 | HQ108365 | KX390894 |
| KP688155 | HQ108355 | KP688130 |
| JX194235 | JX194183 | JN713628 |
| HQ655377 | JX194181 | JN713614 |
| HQ655356 | JX194189 | KP688134 |
| JX194226 | JX194194 | HQ655383 |
| HQ655379 | HQ655372 | JX194214 |
| JN000041 | KP688106 | HQ655380 |
| HQ655351 | KP688152 | JN000061 |
| HQ655394 | JN713696 | KT998066 |
| HQ655393 | JN713583 | KT998024 |
| JN000038 | KP688084 | KT998247 |
| KP688138 | JX194198 | KX390943 |
| HQ655352 | JN713672 | KX390885 |
| JX194224 | KT998042 | KT998035 |
| HQ655350 | GU972752 | KX390914 |
| JX194201 | JN713650 | KT998146 |
| JX194193 | KU052748 | KT998101 |
| HQ655355 | JN713679 | KX390878 |
| KP688160 | JN713636 | KX390956 |
| JX194218 | JX194202 | KX390948 |
| KP688087 | KP688099 | KX390973 |
| KP688163 | JN713589 | KX390970 |
| HQ108359 | KP688164 | KX390892 |
| KP688145 | JN000009 | KT998016 |

|          |          |          |
|----------|----------|----------|
| KX390901 | JX194195 | KT998285 |
| KT998282 | HQ655401 | KT998004 |
| KX390898 | HQ655345 | KX390939 |
| KT998065 | JX194200 | KX390947 |
| KT998180 | JN713704 | KX390950 |
| KT998169 | JN713648 | KX390976 |
| KT998175 | KT998027 | KT998020 |
| KX390961 | KT998036 | KT998115 |
| KT998188 | KP688100 | KT998099 |
| KT998232 | KT998252 | JN713625 |
| KT998184 | KT998107 | KT998131 |
| KX390933 | KT998017 | HQ655390 |
| KT998219 | KX390975 | KT998183 |
| KT998257 | KP688097 | KT998202 |
| KX390942 | KP688147 | JX194209 |
| KT998011 | KT998191 | JN000025 |
| KT998238 | KT998237 | HQ655387 |
| KT998239 | KT998244 | KT998103 |
| KT998026 | KT998110 | KT998018 |
| KT998193 | KT998166 | JN713680 |
| KT998201 | KT998273 | JN713657 |
| KT998071 | KT998217 | JN713602 |
| KT998198 | KT998025 | JN713599 |
| KT998272 | KX390882 | KX390972 |
| KT998268 | KX390886 | KT998037 |
| KT998181 | KX390941 | JN713645 |
| KT998046 | KX390968 | KT998207 |
| KT998161 | KX390937 | JN713581 |
| KT998189 | KT998122 | KU052744 |
| KT998211 | KT998095 | KT998123 |
| KP688165 | KT998060 | KT998283 |
| KT998263 | KT998072 | KT998266 |
| JX194196 | KT998053 | KT998039 |

|          |          |          |
|----------|----------|----------|
| KX390958 | KT998209 | KT998248 |
| KT998045 | KT998081 | KT998086 |
| KT998055 | KT998251 | EU839601 |
| KT998163 | KT998030 | JN713591 |
| KT998100 | KT998149 | JN713677 |
| KT998048 | KT998241 | JN713707 |
| KX390954 | KT998271 | JN713615 |
| KX390967 | KT998255 | JN713610 |
| KT998062 | KT998261 | JN713569 |
| KT998118 | KT998160 | KT998130 |
| KT998265 | EU839607 | JN713582 |
| KT998033 | KT998279 | KT998009 |
| KU052757 | KT998185 | JN713706 |
| KT998151 | KT998186 | JN713585 |
| KT998109 | EU839606 | JN713576 |
| KT998179 | KU052745 | EU839600 |
| KT998156 | JN713597 | JN713652 |
| KT998031 | EU839608 | KT998128 |
| KT998080 | JN713616 | KT998098 |
| KT998270 | EU839610 | KT998050 |
| KT998145 | EU839609 | EU839603 |
| KX390888 | JN713568 | GU972771 |
| JN713653 | KU052747 | JN713697 |
| KT998076 | EU839602 | KT998019 |
| KU052754 | JN713683 | KT998210 |
| KT998112 | KT998206 | KT998192 |
| KT998218 | KU052755 | JN713673 |
| KT998051 | JN713604 | KU052743 |
| KT998208 | KX390879 | KT998092 |
| KT998021 | KT998111 | EU839596 |
| KT998052 | KT998264 | KT998212 |
| KT998028 | HM030564 | KT998022 |
| KT998178 | KT998164 | JN713669 |

|          |          |          |
|----------|----------|----------|
| JN713681 | JN713702 | KT998005 |
| KT998056 | KT998038 | KT998176 |
| KT998204 | KT998057 | KT998012 |
| KX390952 | KT998090 | KT998197 |
| KT998105 | KT998002 | KT998277 |
| KT998034 | KX390955 | KT998015 |
| KX390936 | KT998094 | KT998228 |
| KT998154 | KT998215 | KT998147 |
| KX390910 | KT998195 | EU839604 |
| KT998104 | KT998224 | JN713649 |
| KT998119 | KU052742 | JN713647 |
| KT998235 | KT998014 | JN713690 |
| KX390949 | JN713684 | JN713621 |
| KX390977 | JN713665 | JN713692 |
| KT998254 | JN713631 | JN713640 |
| KX390880 | KT998226 | JN713611 |
| KT998139 | JN713633 | JN713626 |
| KX390945 | JN713624 | JN713605 |
| KX390965 | EU839605 | JN713656 |
| KT998286 | GU972782 | JN713685 |
| KT998043 | HM030560 | JN713646 |
| KT998182 | KT998234 | JN713655 |
| KT998274 | GU972780 | JN713642 |
| KT998236 | GU972753 | JN713596 |
| KT998284 | GU972765 | JN713678 |
| KX390944 | HM030559 | JN713608 |
| KX390889 | GU972720 | JN713688 |
| KX390966 | KT998097 | JN713595 |
| KT998200 | JN713587 | JN713708 |
| KX390964 | JN713592 | JN713664 |
| KT998108 | JN713709 | JN713600 |
| KT998113 | KT998069 | JN713662 |
| KT998162 | KT998070 | JN713675 |

|          |          |          |
|----------|----------|----------|
| JN713689 | JN713687 | KX390918 |
| JN713579 | JN713654 | KX390897 |
| JN713573 | JN713638 | JN713609 |
| JN713632 | JN713644 | KU052752 |
| JN713701 | EU839597 | EU839598 |
| JN713643 | JN713567 | KU052758 |
| JN713635 | JN713670 | KX390916 |
| JN713705 | JN713574 | KT998216 |
| JN713607 | JN713703 | JN713699 |
| KT998124 | JN713620 | KT998256 |
| KT998082 | JN713661 | JN713601 |
| KT998085 | KT998067 | JN713630 |
| KT998253 | KT998089 | JN713571 |
| KT998063 | JN713612 | KT998064 |
| KT998054 | JN713594 | KU052751 |
| JN713668 | JN713693 | KT998007 |
| JN713577 | JN713666 | JN713590 |
| JN713578 | JN713629 | JN713617 |
| JN713622 | KT998129 | GU972727 |
| KT998275 | KT998126 | GU972766 |
| JN713613 | KX390971 | GU972781 |
| JN713570 | KT998269 | KU052746 |
| JN713695 | KT998223 | JN713588 |
| KT998230 | JN713674 | JN713627 |
| KT998059 | HQ108363 | KT998041 |
| JN713598 | KT998249 | KX390960 |
| JN713676 | KT998152 | KT998233 |
| JN713572 | KT998116 | KT998242 |
| KT998058 | KT998203 |          |
| KT998068 | KT998032 |          |
| GU972774 | KT998155 |          |
| GU972777 | KT998222 |          |
| KU052753 | KX390884 |          |
