# Supplementary material for: Few amino acid signatures distinguish HIV-1 subtype B pandemic and non-pandemic strains
Source: PLOS journal article supplement (doi:10.1371/journal.pone.0238995), 2020-09-22
Supplement: S3 (10.1371/journal.pone.0238995.s003) [file journal.pone.0238995.s003]

**S2 Table.** HIV-1 subtype D full-length genome sequences.

| <b>Country</b>       | <b>N</b>                |
|----------------------|-------------------------|
| CD                   | 7                       |
| CM                   | 5                       |
| KE                   | 3                       |
| SN                   | 1                       |
| UG                   | 1                       |
| TZ                   | 1                       |
| <b>Total (Years)</b> | <b>18 (1983 – 2011)</b> |

The table summarize the full-length (FL) HIV-1 Subtype D sequences used in our study and their sampling range. \* Country codes are in accordance with ISO 3166-1.
